# Supplementary material
Source: PubMed Central journal article supplement (PMC4076074)
Supplement: supp_M049809_jlr.M049809-1.pdf [file supp_M049809_jlr.M049809-1.pdf]

**Supplemental Table I: Composition of diets.<sup>a</sup>**

| Ingredients             | Control | HF    | HF-OA | HF-EPA | HF-DHA |
|-------------------------|---------|-------|-------|--------|--------|
| Casein                  | 185.0   | 205.0 | 205.0 | 205.0  | 205.0  |
| L-cystine               | 2.5     | 3.0   | 3.0   | 3.0    | 3.0    |
| Corn starch             | 369.98  | 98.94 | 98.94 | 98.94  | 98.94  |
| Maltodextrin            | 140.0   | 140.0 | 140.0 | 140.0  | 140.0  |
| Sucrose                 | 150.0   | 225.0 | 225.0 | 225.0  | 225.0  |
| Cellulose (fiber)       | 50.0    | 24.0  | 24.0  | 24.0   | 24.0   |
| Soybean oil             | 50.0    | 15.0  | 15.0  | 15.0   | 15.0   |
| Anhydrous milk fat      | 0.0     | 223.0 | 204.6 | 204.6  | 204.6  |
| OA ethyl ester          | 0.0     | 0.0   | 18.4  | 0.0    | 0.0    |
| EPA ethyl ester         | 0.0     | 0.0   | 0.0   | 18.4   | 0.0    |
| DHA ethyl ester         | 0.0     | 0.0   | 0.0   | 0.0    | 18.4   |
| Mineral mix, AIN-93M-MX | 35.0    | 44.0  | 44.0  | 44.0   | 44.0   |
| Vitamin mix, AIN-93-VX  | 15.0    | 19.0  | 19.0  | 19.0   | 19.0   |
| Choline bitartrate      | 2.5     | 3.0   | 3.0   | 3.0    | 3.0    |
| TBHQ antioxidant        | 0.02    | 0.06  | 0.06  | 0.06   | 0.06   |

<sup>a</sup>Values are grams per kilogram.
