# Supplementary material
Source: PubMed Central journal article supplement (PMC4076074)
Supplement: supp_M049809_jlr.M049809-2.pdf [file supp_M049809_jlr.M049809-2.pdf]

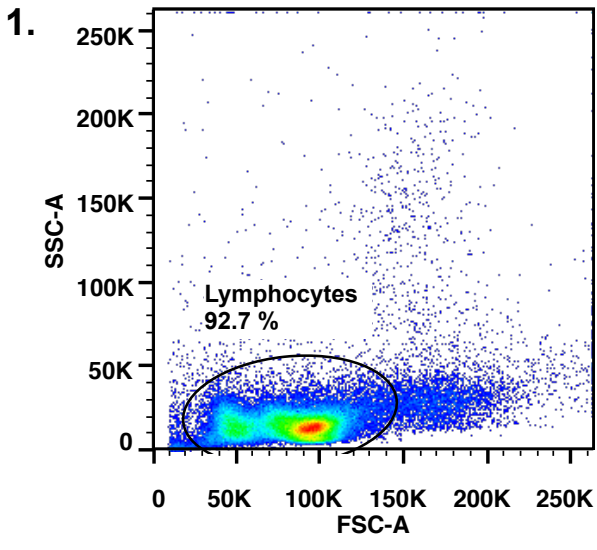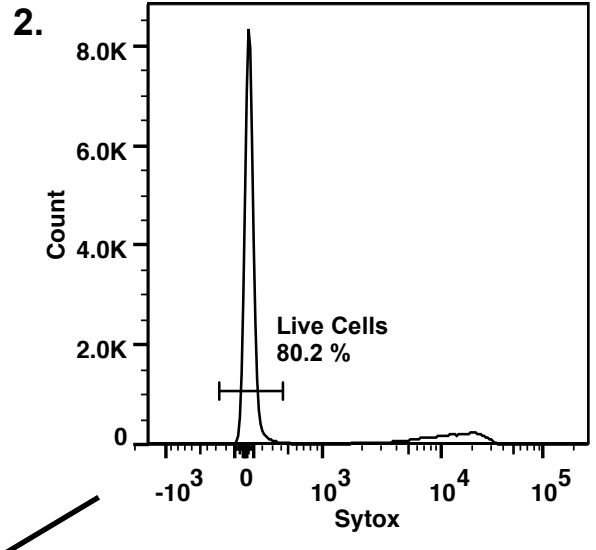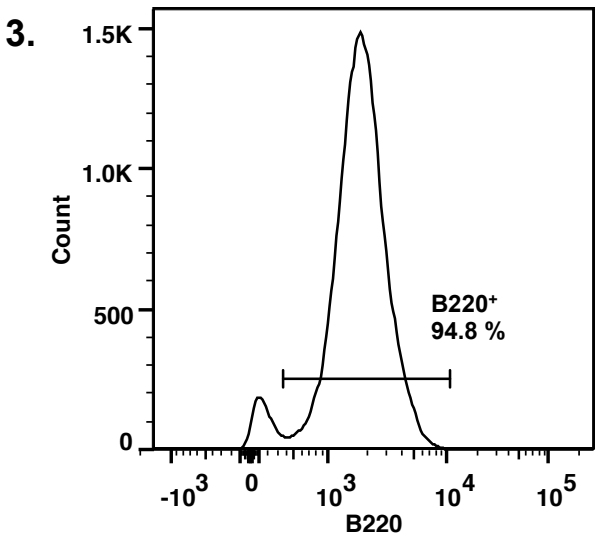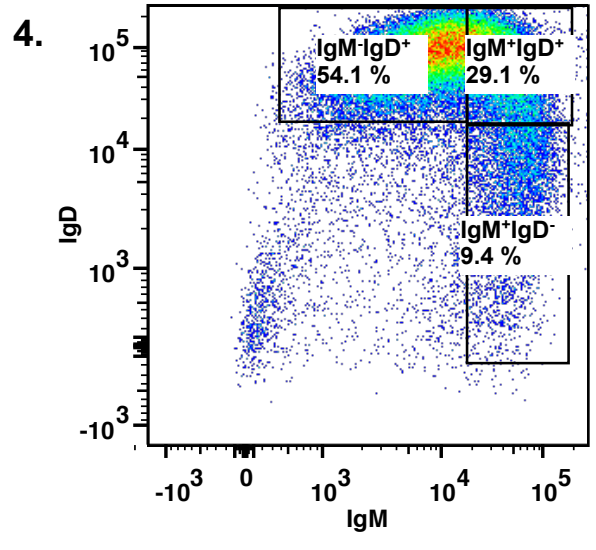

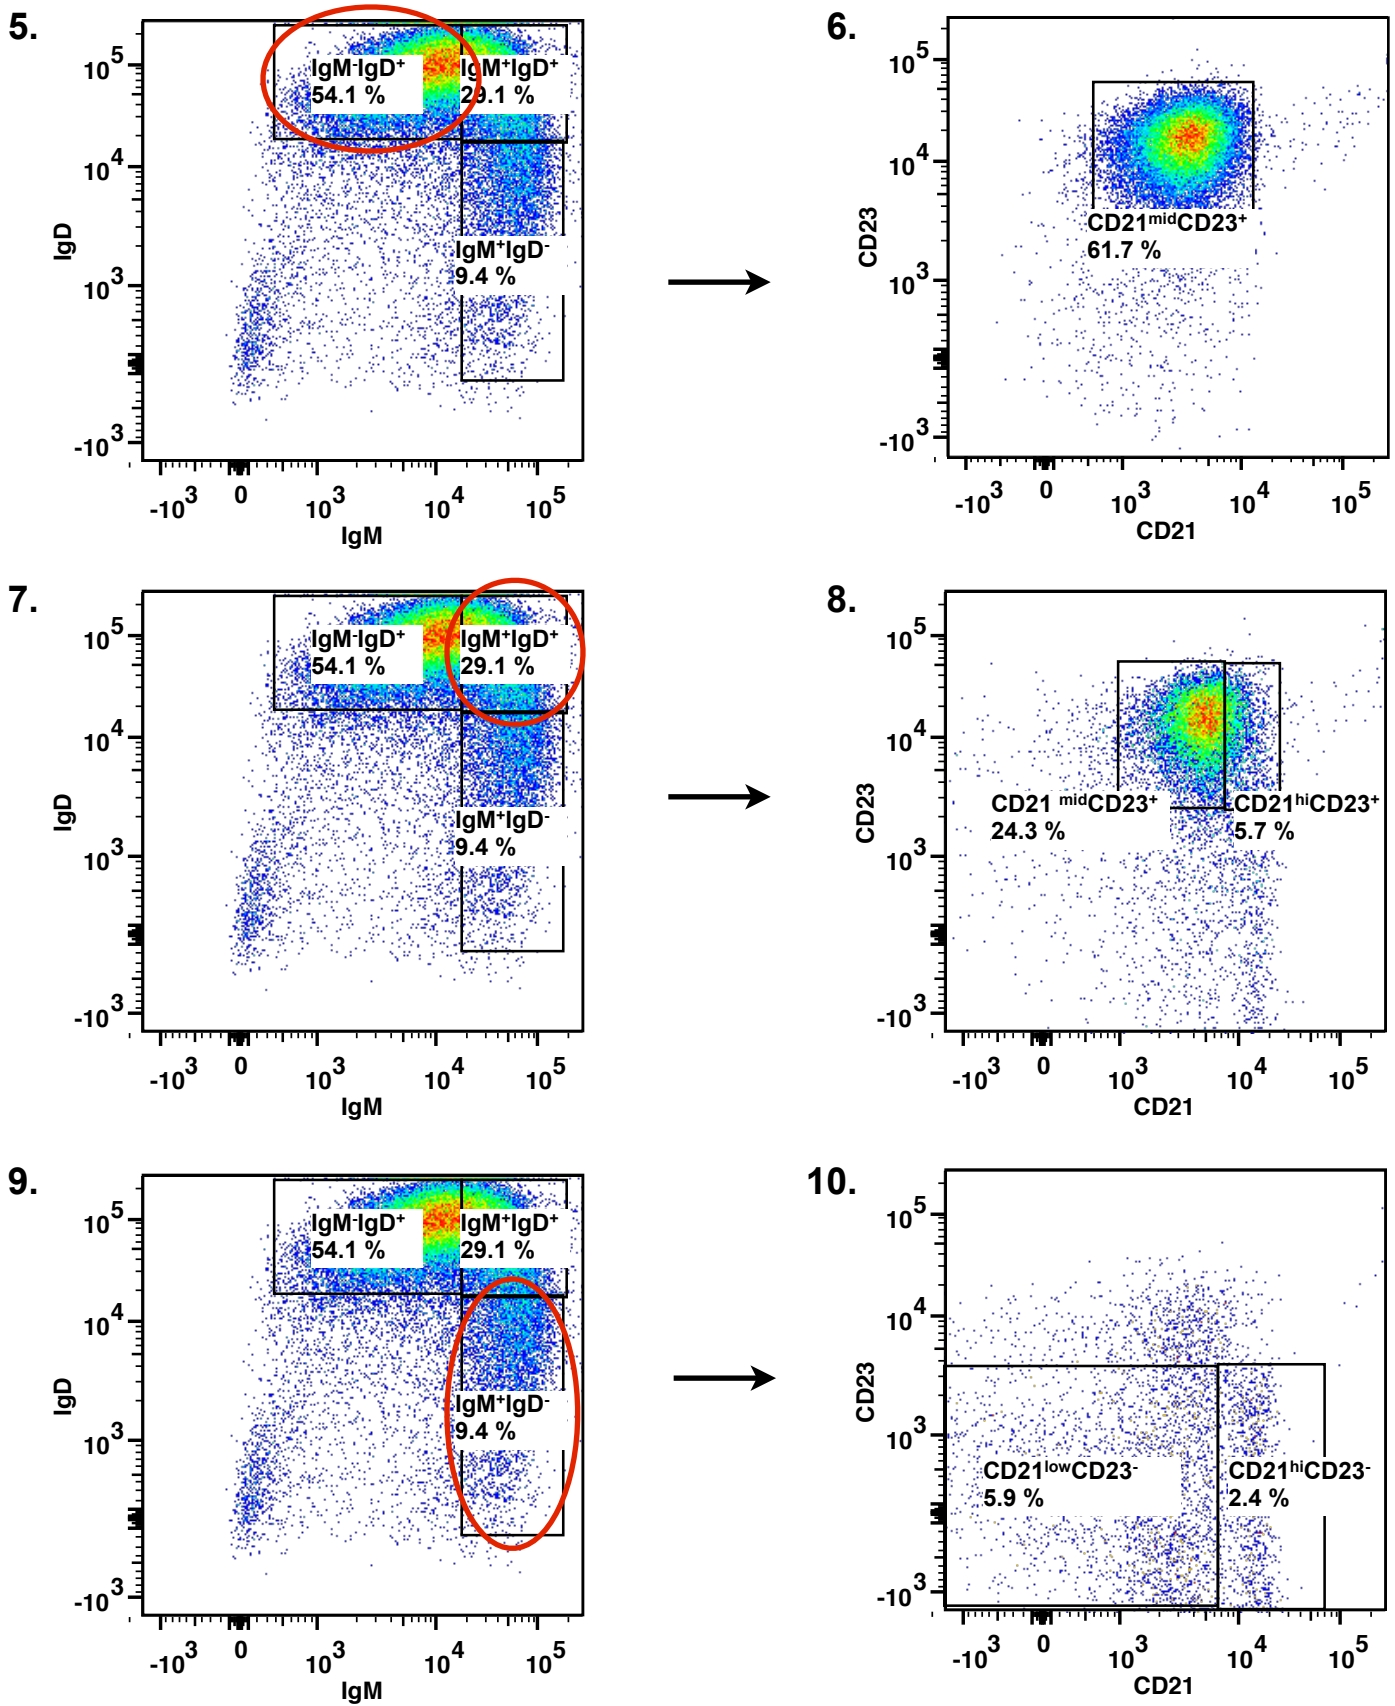

**Supplemental Figure 1: Splenic B220<sup>+</sup> B-cell subset gating strategy.** The gating strategy utilized to determine the percentage of IgM<sup>+</sup>IgD<sup>-</sup>CD21<sup>low</sup>CD23<sup>-</sup>, IgM<sup>+</sup>IgD<sup>+</sup>CD21<sup>mid</sup>CD23<sup>+</sup>, IgM<sup>+</sup>IgD<sup>+</sup>CD21<sup>hi</sup>CD23<sup>+</sup>, IgM<sup>+</sup>IgD<sup>-</sup>CD21<sup>hi</sup>CD23<sup>-</sup> and IgD<sup>+</sup>IgM<sup>-</sup>CD21<sup>mid</sup>CD23<sup>+</sup> B-cell subsets.
